# Supplementary material for: Rising co-payments coincide with unwanted effects on continuity of healthcare for patients with schizophrenia in the Netherlands
Source: PLOS journal article supplement (doi:10.1371/journal.pone.0222046), 2019-09-12
Supplement: S2 (10.1371/journal.pone.0222046.s002) [file journal.pone.0222046.s002]

S1 Table. Trends of psychiatric and somatic care and general co-payments, results of time series analysis (ARIMA) over 2009-2014

|                                                                             | year<br>quarter | 2009<br>q1 | q2   | q3   | q4   | 2010<br>q1 | q2   | q3   | q4   | 2011<br>q1 | q2   | q3   | q4   | 2012<br>q1              | q2   | q3   | q4   | 2013<br>q1 | q2   | q3   | q4   | 2014<br>q1 | q2   | q3   | q4   |
|-----------------------------------------------------------------------------|-----------------|------------|------|------|------|------------|------|------|------|------------|------|------|------|-------------------------|------|------|------|------------|------|------|------|------------|------|------|------|
| Elective psychiatric care                                                   |                 |            |      |      |      |            |      |      |      |            |      |      |      |                         |      |      |      |            |      |      |      |            |      |      |      |
| patients with elective outpatient care plus antipsychotic medication        |                 | 66%        | 65%  | 64%  | 66%  | 65%        | 64%  | 63%  | 64%  | 62%        | 62%  | 61%  | 62%  | 60%                     | 59%  | 59%  | 59%  | 59%        | 59%  | 58%  | 59%  | 57%        | 56%  | 55%  | 55%  |
| patients with elective outpatient care without antipsychotic medication     |                 | 16%        | 16%  | 16%  | 14%  | 14%        | 14%  | 14%  | 13%  | 13%        | 13%  | 13%  | 12%  | 12%                     | 11%  | 11%  | 10%  | 10%        | 9%   | 10%  | 9%   | 9%         | 9%   | 9%   | 8%   |
| patients with only antipsychotic medication                                 |                 | 10%        | 10%  | 10%  | 9%   | 10%        | 11%  | 11%  | 10%  | 11%        | 12%  | 12%  | 12%  | 13%                     | 14%  | 14%  | 14%  | 14%        | 15%  | 15%  | 15%  | 16%        | 16%  | 17%  | 17%  |
| patients without elective outpatient care and antipsychotic medication      |                 | 8%         | 9%   | 10%  | 10%  | 11%        | 11%  | 12%  | 13%  | 13%        | 14%  | 14%  | 14%  | 15%                     | 16%  | 16%  | 16%  | 16%        | 17%  | 17%  | 17%  | 18%        | 18%  | 19%  | 19%  |
| patients with elective outpatient care                                      |                 | 82%        | 81%  | 80%  | 80%  | 79%        | 78%  | 77%  | 77%  | 76%        | 74%  | 74%  | 74%  | 72%                     | 70%  | 70%  | 70%  | 69%        | 68%  | 68%  | 68%  | 66%        | 65%  | 64%  | 64%  |
| patients with antipsychotic medication                                      |                 | 76%        | 76%  | 75%  | 75%  | 75%        | 75%  | 74%  | 74%  | 74%        | 74%  | 73%  | 74%  | 73%                     | 74%  | 73%  | 74%  | 73%        | 74%  | 73%  | 73%  | 73%        | 73%  | 72%  | 73%  |
| number of patients starting new elective outpatient care                    |                 | 2725       | 1872 | 2035 | 3250 | 2579       | 1724 | 1929 | 3055 | 2507       | 1614 | 1854 | 2847 | 2244                    | 1473 | 1721 | 2834 | 2122       | 1520 | 1885 | 2616 | 2123       | 1462 | 1702 | 2289 |
| amount of elective outpatient care per patient (average costs in euros)     |                 | 875        | 555  | 636  | 1093 | 810        | 540  | 615  | 978  | 780        | 513  | 571  | 902  | 742                     | 514  | 590  | 976  | 657        | 481  | 568  | 838  | 628        | 425  | 470  | 675  |
| amount of antipsychotic medication (average number of DDD <sup>a</sup> )    |                 | 80         | 83   | 80   | 84   | 79         | 82   | 80   | 82   | 80         | 82   | 81   | 82   | 81                      | 82   | 81   | 84   | 81         | 83   | 81   | 84   | 80         | 83   | 83   | 86   |
| Episodic psychiatric care                                                   |                 |            |      |      |      |            |      |      |      |            |      |      |      |                         |      |      |      |            |      |      |      |            |      |      |      |
| all patients                                                                |                 | 22%        | 20%  | 20%  | 20%  | 18%        | 17%  | 17%  | 17%  | 16%        | 16%  | 15%  | 15%  | 15%                     | 14%  | 14%  | 14%  | 14%        | 14%  | 14%  | 14%  | 13%        | 13%  | 12%  | 13%  |
| patients with elective outpatient care plus antipsychotic medication        |                 | 9%         | 7%   | 8%   | 10%  | 8%         | 7%   | 6%   | 8%   | 7%         | 6%   | 6%   | 7%   | 7%                      | 6%   | 6%   | 7%   | 8%         | 7%   | 7%   | 9%   | 7%         | 7%   | 6%   | 8%   |
| patients with elective outpatient care without antipsychotic medication     |                 | 14%        | 14%  | 12%  | 14%  | 12%        | 11%  | 10%  | 12%  | 11%        | 11%  | 10%  | 10%  | 9%                      | 10%  | 11%  | 10%  | 11%        | 10%  | 14%  | 13%  | 10%        | 11%  | 12%  | 14%  |
| patients with only antipsychotic medication                                 |                 | 88%        | 85%  | 83%  | 78%  | 74%        | 72%  | 68%  | 63%  | 63%        | 61%  | 61%  | 57%  | 52%                     | 51%  | 48%  | 43%  | 43%        | 45%  | 44%  | 40%  | 38%        | 35%  | 34%  | 29%  |
| patients without elective psychiatric care                                  |                 | 64%        | 53%  | 44%  | 37%  | 35%        | 30%  | 29%  | 27%  | 24%        | 25%  | 24%  | 21%  | 19%                     | 17%  | 16%  | 17%  | 15%        | 15%  | 13%  | 14%  | 13%        | 12%  | 11%  | 11%  |
| subgroup with every quarter elective care                                   |                 | 13%        | 11%  | 11%  | 11%  | 9%         | 9%   | 9%   | 9%   | 8%         | 8%   | 8%   | 8%   | 8%                      | 8%   | 8%   | 8%   | 9%         | 9%   | 9%   | 9%   | 8%         | 8%   | 8%   | 9%   |
| subgroup with quarters without elective care                                |                 | 35%        | 33%  | 32%  | 32%  | 30%        | 29%  | 28%  | 28%  | 27%        | 26%  | 25%  | 25%  | 24%                     | 23%  | 23%  | 23%  | 23%        | 22%  | 22%  | 22%  | 21%        | 19%  | 18%  | 18%  |
| number of patients starting new episodic psychiatric treatment              |                 | 725        | 590  | 610  | 760  | 637        | 504  | 516  | 678  | 575        | 461  | 439  | 574  | 518                     | 450  | 507  | 629  | 644        | 499  | 564  | 646  | 543        | 485  | 464  | 562  |
| amount of psychiatric care per patient (average costs in euros)             |                 | 1742       | 1525 | 1577 | 1986 | 1737       | 1304 | 1365 | 1794 | 1468       | 1075 | 1262 | 1661 | 1596                    | 1091 | 1359 | 1827 | 1505       | 1121 | 1328 | 1764 | 1336       | 940  | 1133 | 1472 |
| Somatic care                                                                |                 |            |      |      |      |            |      |      |      |            |      |      |      |                         |      |      |      |            |      |      |      |            |      |      |      |
| average adjusted costs of somatic care (euros)                              |                 | 410        | 444  | 435  | 439  | 400        | 448  | 445  | 462  | 424        | 460  | 467  | 464  | 485                     | 449  | 450  | 468  | 507        | 526  | 524  | 485  | 520        | 525  | 550  | 539  |
| Co-payments                                                                 |                 |            |      |      |      |            |      |      |      |            |      |      |      |                         |      |      |      |            |      |      |      |            |      |      |      |
| co-payments for all care under the Health Insurance Law (per year in euros) |                 | 155        |      |      |      | 165        |      |      |      | 170        |      |      |      | 220                     |      |      |      | 350        |      |      |      | 360        |      |      |      |
| co-payments for psychiatric outpatient and inpatient care                   |                 |            |      |      |      |            |      |      |      |            |      |      |      | psychiatric co-payments |      |      |      |            |      |      |      |            |      |      |      |
| Price and cost indices for psychiatric and somatic care                     |                 |            |      |      |      |            |      |      |      |            |      |      |      |                         |      |      |      |            |      |      |      |            |      |      |      |
| price index psychiatric care (treatment)                                    |                 | 100        |      |      |      | 98         |      |      |      | 99         |      |      |      | 100                     |      |      |      | 104        |      |      |      | 115        |      |      |      |
| price index psychiatric care (hospital bed)                                 |                 | 100        |      |      |      | 98         |      |      |      | 99         |      |      |      | 83                      |      |      |      | 85         |      |      |      | 86         |      |      |      |
| cost index somatic care                                                     |                 | 100        | 96   | 94   | 98   | 100        | 97   | 96   | 101  | 105        | 100  | 98   | 102  | 102                     | 105  | 102  | 108  | 109        | 108  | 106  | 111  | 110        | 110  | 109  | 113  |

|                                                                                 | year    | 2009 |    |    |    | 2010 |    |    |    | 2011 |    |    |    | 2012 |    |    |    | 2013 |    |    |    | 2014 |    |    |    |
|---------------------------------------------------------------------------------|---------|------|----|----|----|------|----|----|----|------|----|----|----|------|----|----|----|------|----|----|----|------|----|----|----|
|                                                                                 | quarter | q1   | q2 | q3 | q4 | q1   | q2 | q3 | q4 | q1   | q2 | q3 | q4 | q1   | q2 | q3 | q4 | q1   | q2 | q3 | q4 | q1   | q2 | q3 | q4 |
| Deviations in trends: p-values, Level Shifts and Additive Outliers <sup>b</sup> |         |      |    |    |    |      |    |    |    |      |    |    |    |      |    |    |    |      |    |    |    |      |    |    |    |
| Elective psychiatric care                                                       |         |      |    |    |    |      |    |    |    |      |    |    |    |      |    |    |    |      |    |    |    |      |    |    |    |
| patients with elective outpatient care plus antipsychotic medication            |         |      |    |    |    |      |    |    |    |      |    |    |    |      |    |    |    |      |    |    |    |      |    |    |    |
| patients with elective outpatient care without antipsychotic medication         |         |      |    |    |    |      |    |    |    |      |    |    |    |      |    |    |    |      |    |    |    |      |    |    |    |
| patients with only antipsychotic medication                                     |         |      |    |    |    |      |    |    |    |      |    |    |    |      |    |    |    |      |    |    |    |      |    |    |    |
| patients without elective outpatient care and antipsychotic medication          |         |      |    |    |    |      |    |    |    |      |    |    |    |      |    |    |    |      |    |    |    |      |    |    |    |
| patients with elective outpatient care                                          |         |      |    |    |    |      |    |    |    |      |    |    |    |      |    |    |    |      |    |    |    |      |    |    |    |
| patients with antipsychotic medication                                          |         |      |    |    |    |      |    |    |    |      |    |    |    |      |    |    |    |      |    |    |    |      |    |    |    |
| number of patients starting new psychiatric treatment                           |         |      |    |    |    |      |    |    |    |      |    |    |    |      |    |    |    |      |    |    |    |      |    |    |    |
| amount of psychiatric care per patient (average costs in euros)                 |         |      |    |    |    |      |    |    |    |      |    |    |    |      |    |    |    |      |    |    |    |      |    |    |    |
| amount of antipsychotic medication (average number of DDD)                      |         |      |    |    |    |      |    |    |    |      |    |    |    |      |    |    |    |      |    |    |    |      |    |    |    |
| Episodic psychiatric care                                                       |         |      |    |    |    |      |    |    |    |      |    |    |    |      |    |    |    |      |    |    |    |      |    |    |    |
| all patients                                                                    |         |      |    |    |    |      |    |    |    |      |    |    |    |      |    |    |    |      |    |    |    |      |    |    |    |
| patients with elective outpatient care plus antipsychotic medication            |         |      |    |    |    |      |    |    |    |      |    |    |    |      |    |    |    |      |    |    |    |      |    |    |    |
| patients with elective outpatient care without antipsychotic medication         |         |      |    |    |    |      |    |    |    |      |    |    |    |      |    |    |    |      |    |    |    |      |    |    |    |
| patients with only antipsychotic medication                                     |         |      |    |    |    |      |    |    |    |      |    |    |    |      |    |    |    |      |    |    |    |      |    |    |    |
| patients without elective psychiatric care                                      |         |      |    |    |    |      |    |    |    |      |    |    |    |      |    |    |    |      |    |    |    |      |    |    |    |
| subgroup with every quarter elective care                                       |         |      |    |    |    |      |    |    |    |      |    |    |    |      |    |    |    |      |    |    |    |      |    |    |    |
| subgroup with quarters without elective care                                    |         |      |    |    |    |      |    |    |    |      |    |    |    |      |    |    |    |      |    |    |    |      |    |    |    |
| number of patients starting new psychiatric treatment                           |         |      |    |    |    |      |    |    |    |      |    |    |    |      |    |    |    |      |    |    |    |      |    |    |    |
| amount of psychiatric care per patient (average costs in euros)                 |         |      |    |    |    |      |    |    |    |      |    |    |    |      |    |    |    |      |    |    |    |      |    |    |    |
| Somatic care                                                                    |         |      |    |    |    |      |    |    |    |      |    |    |    |      |    |    |    |      |    |    |    |      |    |    |    |
| average adjusted costs of somatic care (euros)                                  |         |      |    |    |    |      |    |    |    |      |    |    |    |      |    |    |    |      |    |    |    |      |    |    |    |

<sup>a</sup> DDD: Defined Daily Dose

<sup>b</sup> results of testing deviations of trends with Arima are indicated in the table with:

<sup>c</sup> 2012q4: additive outlier (p=0,0003) and upwards level shift (p=0,0435)

upwards level shift

downwards level shift

additive outlier
